# Supplementary material for: Sunlight-induced efficient and selective photocatalytic benzene oxidation on TiO2-supported gold nanoparticles under CO2 atmosphere
Source: Royal Society of Chemistry journal article supplement (doi:10.1039/c1cc14662a), 2011-01-01
Supplement: c1cc14662a.pdf [file c1cc14662a.pdf]

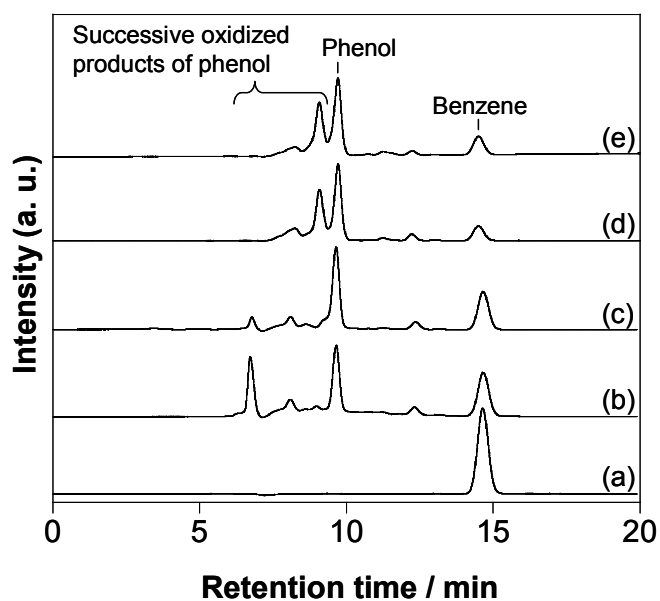

**Fig. S1** Chromatograms of benzene solutions (a) before and after photocatalytic reaction on 3%Au@P25 (b) in air and (c) under CO<sub>2</sub> (230 kPa), and on P25 (d) in air and (e) under CO<sub>2</sub> (230 kPa).

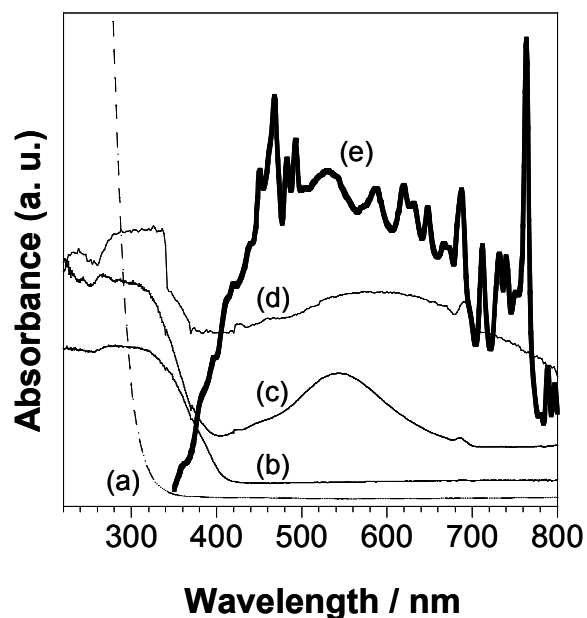

**Fig. S2** UV-Vis. spectra of (a) Pylex glass window of the present reactor, (b) P25, (c) 3%Au@P25 and (d) 4%Au@Tynoc, and (e) radiation spectrum of a solar simulator used.

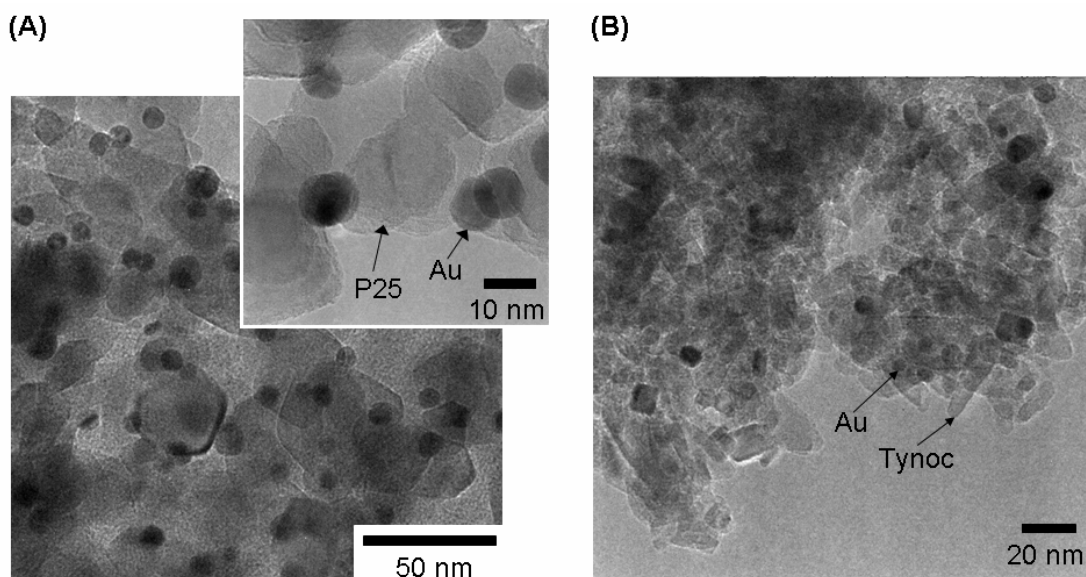

**Fig. S3** TEM images of (a) 3%Au@P25 and (b) 4%Au@Tynoc.

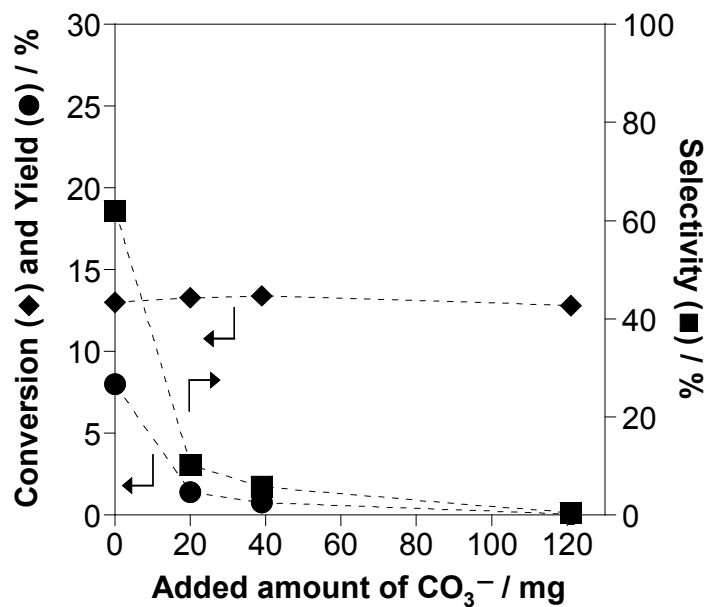

**Fig. S4** The photocatalytic benzene oxidation activity on 3%Au@P25 in air as a function of the amount of the added NaCO<sub>3</sub> in the reaction mixture.
